# Supplementary material
Source: publisher figshare collection journal article supplement (https://acs.figshare.com/ndownloader/files/3969406)
Supplement: Supplementary file 1 [file 3969406]

Supporting Information to

## **Taking control over control: Use of product sensing in single cells to remove flux control at key enzymes in biosynthesis pathways**

by Schendzielorz et al.

### **Supplementary Video S1**

|           | Description                                                            | Page |
|-----------|------------------------------------------------------------------------|------|
| Figure S1 | Dose response curves for pSenLys-Spec                                  | 2    |
| Figure S2 | The microfluidic cell devise used for microscopic single cell analysis | 3    |
| Figure S3 | Plasmids used                                                          | 4    |
| Figure S4 | Isothermal titration calorimetry with different ArgB proteins          | 5    |
| Figure S5 | Alignment of bacterial ArgB sequences                                  | 6    |
| Figure S6 | Inhibition kinetics of HisG and LysC muteins                           | 7    |
| Table S1  | Nucleotide and amino acids exchanges in ArgB muteins                   | 8    |
| Table S2  | Primers used for site-specific saturation of <i>argB</i>               | 8    |
| Table S3  | ArgB Mutation in mutants and their L-arginine accumulation             | 9    |
| Table S4  | Data of gel permeation chromatografie for ArgB proteins                | 9    |
| Table S5  | Primers for site-specific saturation of <i>hisG</i>                    | 10   |
| Table S6  | Nucleotide and amino acid exchanges in <i>lysC</i> alleles             | 11   |
| Table S7  | Nucleotide and amino acid exchanges in <i>hisG</i> alleles             | 12   |

### Supplementary Figure S1

Exogenous-Arg-Ala-dose response (red squares) and Ala-Ala-dose response (black circles) of *C. glutamicum* carrying pSenLys-Spc.

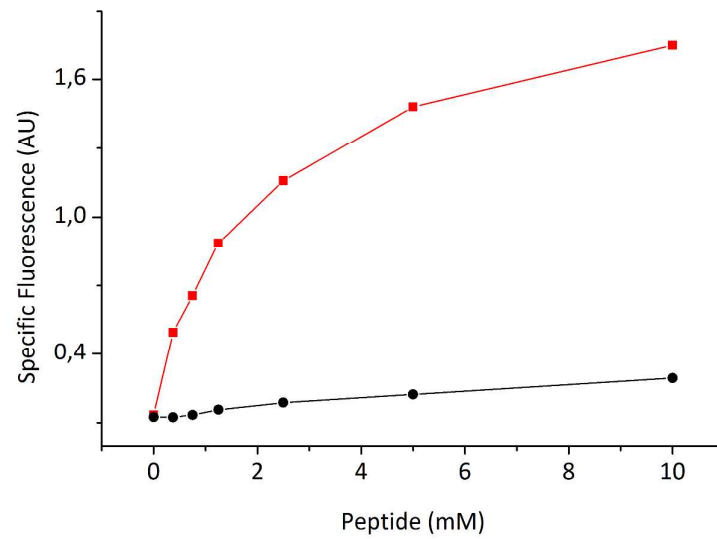

### Supplementary Figure S2:

The microfluidic single cell chemostat used in this study is intended for long-term growth coupled metabolic studies. The device contains several hundred ( $1\ \mu\text{m} \times 1\ \mu\text{m} \times 20\ \mu\text{m}$ ) growth channels that allow for high-throughput single cell cultivation under environmental constant conditions. Using time-lapse-microscopy, growth coupled fluorescence studies on single cell level can be performed. In comparison to cultivation boxes, where only 8 to 9 generations can be followed (Grünberger *et al.*, 2013), here growth can be studied over many generations (here over 30) at constant conditions. During the seeding phase (Figure 1A), single cells are trapped within the channels. After a sufficient amount of cells is trapped, continuous growth is initiated by constant supply of medium of interest (Figure 1B). During the experiment cells are growing and excess cells are pushed out of the channel system which are removed with the medium flow. This procedure can be maintained for up to several days, depending on organism and experimental aim.

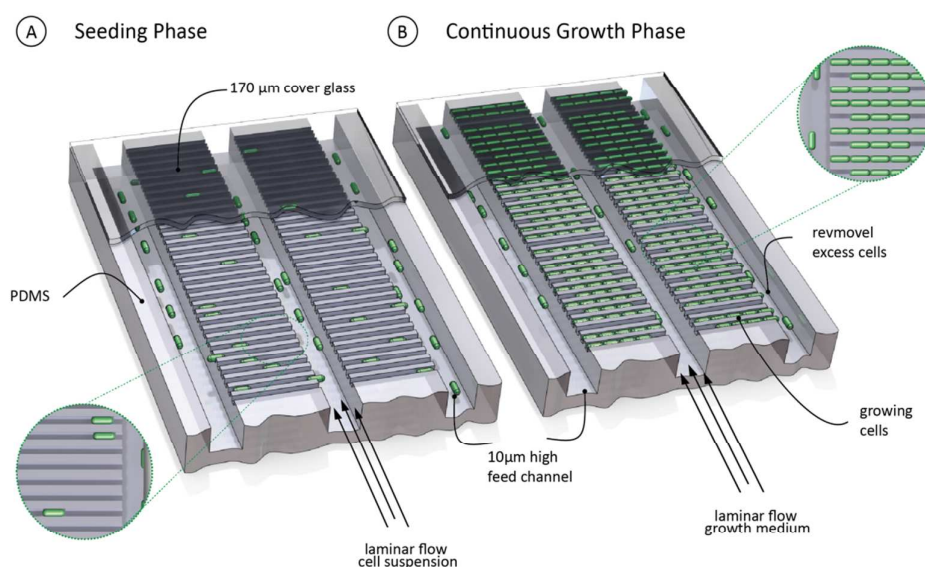

### Plasmids constructed and used in this study.

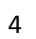

**Supplementary Figure S4:**

Results from isothermal titration calorimetry experiments with different ArgB proteins and L-arginine. (a) Wild-type ArgB; (b) ArgB-K47H; (c) ArgB-K47H-V65A, first peak from size exclusion chromatography (see Figure 5); (d) ArgB-K47H-V65A, second peak from size exclusion chromatography; (e) ArgB-K47H-G122T-T180P. Best fitting results for (a) and (b) were achieved with a sequential binding model and six binding sites using Origin 7G software. In case of (c), (d) and (e), no heat exchange was detectable.

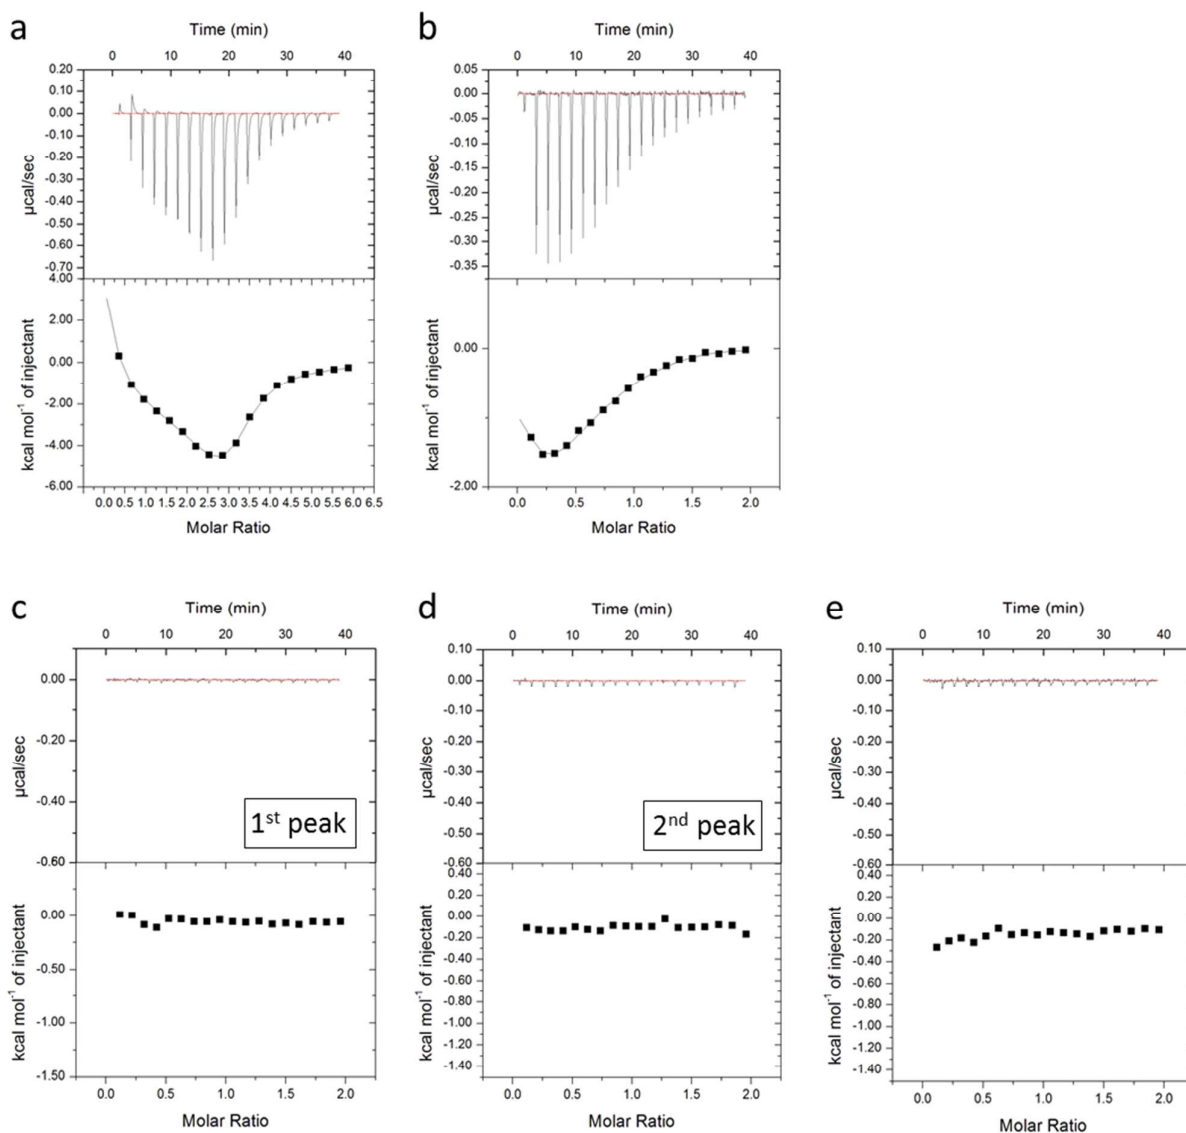

### Supplementary Figure S5:

ClustalW alignment of ArgB from *C. glutamicum* (UniProt ID: A4QDZ0) with homologs of known structure such as ArgB from *M. tuberculosis* (PDB ID: 2AP9), *P. aeruginosa* (2BUF), *A. thaliana* (2RD5), and *T. maritima* (2BTY). Residues aligning with K47 from *C. glutamicum* are shaded in gray and are shown with highlighted helices  $\alpha$ N and  $\alpha$ A (green) as well as the  $\beta$ 1 strand (cyan).

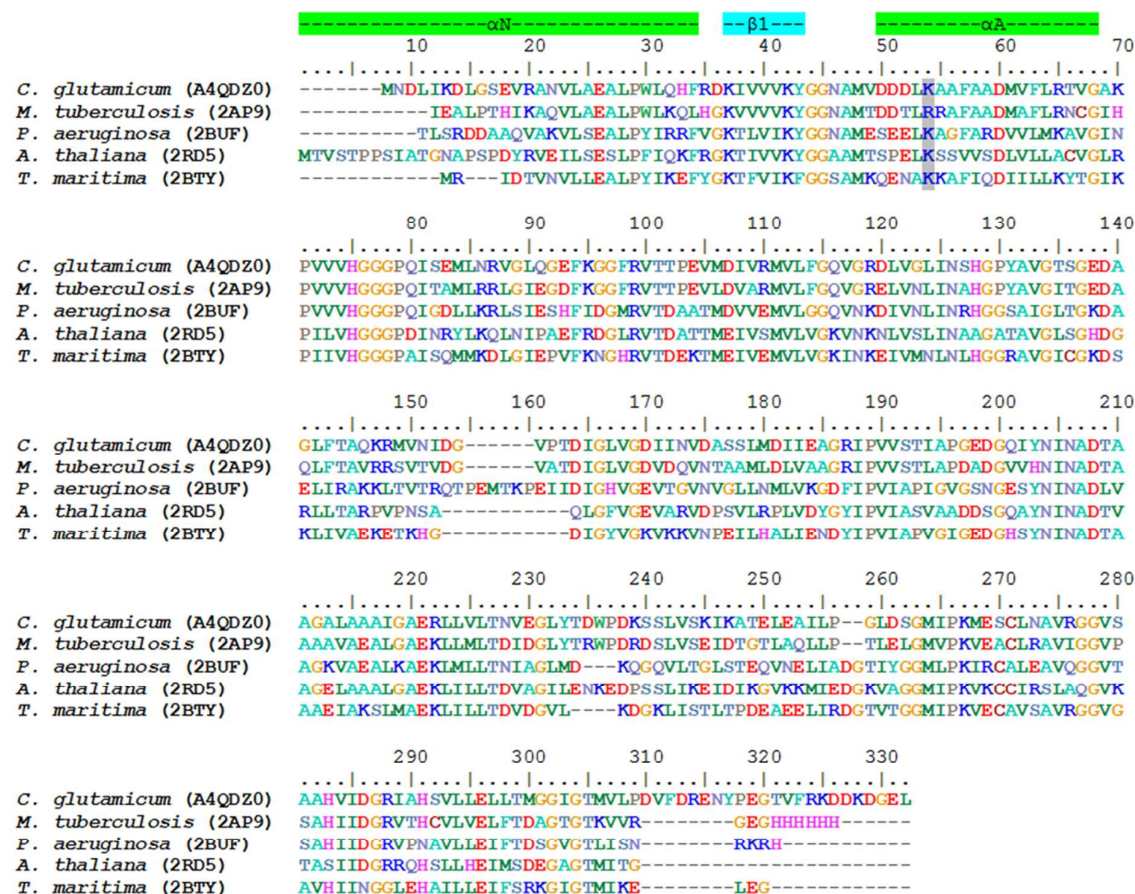

### Supplementary Figure S6:

Inhibition kinetics of selected HisG and LysC muteins, obtained from activity assays with isolated protein.

(a) Relative activity of HisG muteins in presence of L-histidine: black squares, wild-type enzyme; blue triangles, HisG-GT233HQ; red circles, HisG-N216I; green triangles, HisG-N216R. (b) Relative activity of LysC muteins in presence of L-lysine (plus 10 mM L-threonine): black squares, wild-type enzyme; green triangles, LysC-c88; red circles, LysC-c77; blue triangles, LysC-c90.

The  $k_{sp}$  A for the respective enzyme without allosteric regulator was as follows (in  $\mu\text{mol min}^{-1} \text{mg}^{-1}$ ): HisG-WT= $1.59 \pm 0.04$ ; HisG-GT233HQ= $0.61 \pm 0.03$ ; HisG-N216I= $1.68 \pm 0.04$ ; HisG-N216R= $1.56 \pm 0.04$ ; LysC-WT= $1.17 \pm 0.03$ ; LysC-c88= $1.40 \pm 0.03$ ; LysC-c77= $1.09 \pm 0.03$ ; LysC-c90= $2.29 \pm 0.13$ .

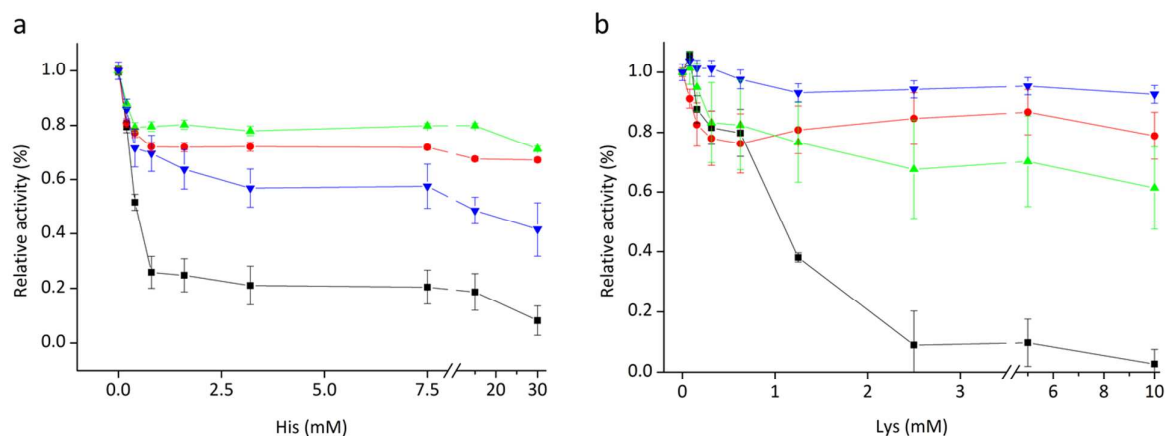

**Supplementary Table S1:**

Nucleotide and amino acids exchanges in the isolated ArgB muteins.

| ArgB 14 | ArgB 88 | ArgB 79 | ArgB 37 | ArgB 39 | ArgB 18 | ArgB 59 | Nucleotide exchange | Wild-type codon | Mutant codon | Mutation |
|---------|---------|---------|---------|---------|---------|---------|---------------------|-----------------|--------------|----------|
| x       |         |         |         |         |         | x       | a139g               | aag             | gag          | K47E     |
|         |         |         |         |         | x       |         | c176a               | acc             | aac          | T59N     |
| x       |         |         |         |         |         |         | t194c               | gtg             | gcg          | V65A     |
|         |         |         |         | x       |         |         | a280t               | acc             | tcc          | T94S     |
|         |         |         |         |         | x       |         | a301g               | att             | gtt          | I101V    |
|         | x       | x       |         |         |         |         | t329c               | gtc             | gcc          | V110A    |
|         | x       |         |         |         |         |         | g365c               | ggc             | gcc          | G122A    |
|         |         |         |         | x       |         |         | a430g               | aac             | gac          | N144D    |
|         |         |         | x       |         |         | x       | a538g               | acg             | gcg          | T180A    |
|         |         |         | x       |         |         | x       | t543c               | att             | atc          | silent   |
|         | x       |         |         |         |         |         | t566c               | att             | act          | I189T    |
|         |         | x       |         |         |         | x       | t569g               | tac             | tgc          | Y190C    |
|         |         |         | x       |         |         | x       | a591g               | gca             | gcg          | silent   |
|         |         |         | x       |         | x       |         | c663t               | acc             | act          | silent   |
|         |         |         |         |         | x       |         | a674g               | gat             | ggt          | D225G    |
| x       | x       |         | x       |         |         |         | c712t               | ctg             | ttg          | silent   |
|         |         |         |         |         |         | x       | t875a               | gtg             | gag          | V292E    |

**Supplementary Table S2:**

Primer sets for site-specific saturation of *argB*.

| Residue | Saturated codon | Primer | Sequence                                              |
|---------|-----------------|--------|-------------------------------------------------------|
| K47     | AAG139NNK       | fw     | CAT GGT GGA TGA TGA TCT CNN KGC TGT TTT TGC TGC CGA C |
|         |                 | rv     | GTC GGC AGC AAA AAC AGC MNN GAG ATC ATC ATC CAC CAT G |
| V65     | GTG193NNK       | fw     | GGG CGC AAA ACC ANN KGT GGT GCA CGG TGG               |
|         |                 | rv     | CCA CCG TGC ACC ACM NNT GGT TTT GCG CCC               |
| V110    | GTC328NNK       | fw     | GGT GCT CTT TGG TCA GNN KGG TCG CGA TTT AGT TG        |
|         |                 | rv     | CAA CTA AAT CGC GAC CMN NCT GAC CAA AGA GCA CC        |
| G122    | GGC364NNK       | fw     | GTT TGA TCA ACT CTC ATN NKC CTT ACG CTG TGG GAA C     |
|         |                 | rv     | GTT CCC ACA GCG TAA GGM NNA TGA GAG TTG ATC AAA C     |
| T180    | ACG538NNK       | fw     | CAT TCC TGT GGT CTC TNN KAT TGC TCC AGG CGA AG        |
|         |                 | rv     | CTT CGC CTG GAG CAA TMN NAG AGA CCA CAG GAA TG        |
| I189    | ATT565NNK       | fw     | CAG GCG AAG ACG GCC AGN NKT ACA ACA TTA ACG CCG       |
|         |                 | rv     | CGG CGT TAA TGT TGT AMN NCT GGC CGT CTT CGC CTG       |
| Y190    | TAC568NNK       | fw     | GCG AAG ACG GCC AGA TTN NKA ACA TTA ACG CCG ATA C     |
|         |                 | rv     | GTA TCG GCG TTA ATG TTM NNA ATC TGG CCG TCT TCG C     |



**Supplementary Table S3:**

Mutations and L-arginine accumulation in culture supernatants for clones isolated from saturation libraries. From each library, 20 cells were sorted and 4 of them were selected for detailed analysis. In the case where only one allele for one position is given all 4 selected clones were identical.

| Clone       | Wildtype Codon | Mutant Codon | Mutation | Arg (mM) | +/-  |
|-------------|----------------|--------------|----------|----------|------|
| argB47-b5   | aag            | gag          | K47E     | 1.2      | 0.02 |
| argB47-c4   | aag            | acg          | K47T     | 3.5      | 0.19 |
| argB47-c8   | aag            | cat          | K47H     | 5.5      | 0.24 |
| argB65-a8   | gtg            | gca          | V65A     | 4.8      | 0.05 |
| argB110-e4  | gtc            | cgt          | V110R    | 1.4      | 0.20 |
| argB122-a5  | ggc            | acg          | G122T    | 11.5     | 0.25 |
| argB180-a4  | acg            | cct          | T180P    | 2.1      | 0.08 |
| argB189-c11 | att            | nd           | nd       | 0.0      | 0.00 |
| argB190-g10 | tac            | nd           | nd       | 0.0      | 0.00 |

**Supplementary Table S4:**

Elution volume of ArgB proteins separated by a Superdex 200 10/300 GL column (GE Healthcare) and calculated molecular masses.

| ArgB protein     | ± 10 mM L-Arginine | Elution volume (ml) | Calculated molecular masses (kDa) |
|------------------|--------------------|---------------------|-----------------------------------|
| WT               | -                  | 12.26               | 231.52                            |
| WT               | +                  | 12.30               | 226.75                            |
| K47H             | -                  | 12.00               | 265.10                            |
| K47H             | +                  | 12.52               | 202.20                            |
| K47H-V65A        | -                  | 11.97; 7.59         | 269.28; ND                        |
| K47A-V65A        | +                  | 13.35; 7.56         | 131.22; ND                        |
| K47H-G122T-T180P | -                  | 7.84                | ND                                |
| K47H-G122T-T180P | +                  | 12.34               | 222.07                            |
| K47H-V65A-T180P  | -                  | 11.95               | 272.10                            |
| K47H-V65A-T180P  | +                  | 12.17               | 242.64                            |

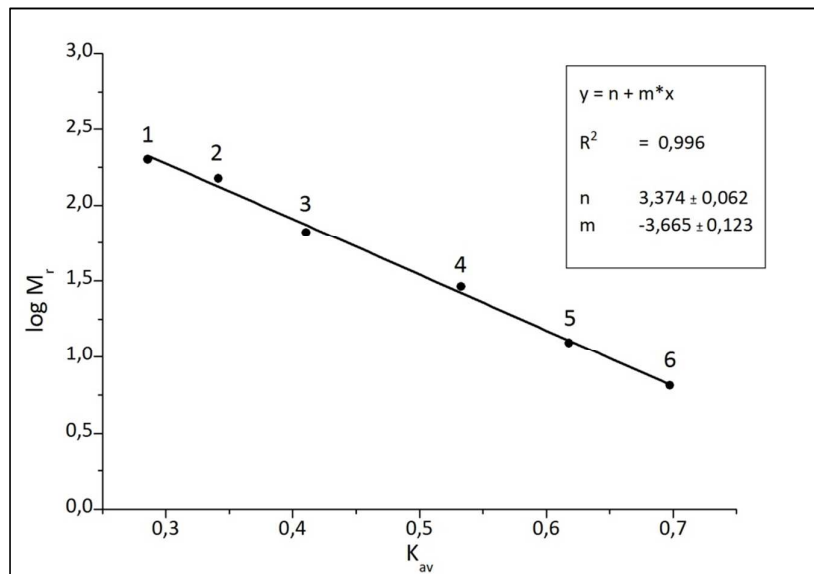

Calibration of Superdex 10/300 GL column. Semilogarithmic plot of molecular weight ( $M_r$ ) against  $K_{av}$  ( $V_0=7.8$  ml;  $V_t=24$  ml). Protein standards: 1, 200 kDa; 2, 150 kDa; 3, 66 kDa; 4, 29 kDa; 5, 12.4 kDa; 6, 6.5 kDa.

#### Supplementary Table S5:

Primer sets for site-specific saturation of *hisG*.

| Residue in <i>M. tuber.</i> | Equivalent residue in <i>C. glut.</i> | Saturated codons in Cg-HisG sequence | Primer | Sequence                                                       |
|-----------------------------|---------------------------------------|--------------------------------------|--------|----------------------------------------------------------------|
| D218                        | N216                                  | AAC(643)NNK                          | fw     | CTT CCT CAT GCT GGA TTA CNN KGT CGA CCG<br>CGA CAA CCT G       |
|                             |                                       |                                      | rv     | CAG GTT GTC GCG GTC GAC MNN GTA ATC<br>CAG CAT GAG GAA G       |
| LE234                       | LS231                                 | TTATCC(691)NNKNNK                    | fw     | CCA CTG CAG TAA CCC CAG GCN NKN NKG<br>GCC CAA CGG TAT CCC CAC |
|                             |                                       |                                      | rv     | GTG GGG ATA CCG TTG GGC CMN NMN NGC<br>CTG GGG TTA CTG CAG TGG |
| SPT236                      | GPT233                                | GGCCCAACG(697)NNKCCANNK              | fw     | GTA ACC CCA GGC TTA TCC NNK CCA NNK GTA<br>TCC CCA CTG GCA CG  |
|                             |                                       |                                      | rv     | CGT GCC AGT GGG GAT ACM NNT GGM NNG<br>GAT AAG CCT GGG GTT AC  |
| L253                        | M250                                  | ATG(748)NNK                          | fw     | GTT GCT GTA CGC GCC NNK GTG CCA CGC<br>AGG TCA G               |
|                             |                                       |                                      | rv     | CTG ACC TGC GTG GCA CMN NGG CGC GTA<br>CAG CAA C               |
| A273                        | A270                                  | GCC(808)NNK                          | fw     | CTG GAC TCG GCG CTG AAN NKA TCC TGG CTT<br>CTG AAA TC          |
|                             |                                       |                                      | rv     | GAT TTC AGA AGC CAG GAT MNN TTC AGC<br>GCC GAG TCC AG          |

**Supplementary Table S6:**Nucleotide and amino acid exchanges in isolated *lysC* alleles.

| Position | Mutation | Nucleotide exchange | Wild-type codon | Mutant codon |
|----------|----------|---------------------|-----------------|--------------|
|          |          |                     |                 |              |
| 20       | R20S     | a60c                | aga             | agc          |
| 21       | N21D     | a61g                | aac             | gac          |
| 24       | E24G     | a71g                | gaa             | gga          |
| 69       | L69F     | c205t               | ctc             | ttc          |
| 78       | N78S     | a233g               | aac             | agc          |
| 123      | E123E    | a369g               | gaa             | gag          |
| 124      | A124P    | g370c               | gca             | cca          |
| 125      | L125L    | c375a               | ctc             | cta          |
| 141      | K141K    | a423g               | aaa             | aag          |
| 159      | V159G    | t476g               | gtt             | ggt          |
| 186      | I186V    | a556g               | atc             | gtc          |
| 211      | I211V    | a631g               | att             | gtt          |
| 227      | L227P    | t680c               | ctt             | cct          |
| 235      | N235D    | a703g               | aat             | gat          |
| 278      | E278G    | a833g               | gag             | ggg          |
| 280      | A280V    | c839t               | gcg             | gtg          |
| 311      | T311I    | c932t               | acc             | atc          |
| 328      | K328E    | a982g               | aag             | gag          |
| 337      | N337S    | a1010g              | aat             | agt          |
| 341      | D341N    | g1021a              | gac             | aac          |
| 350      | V350A    | t1049c              | gtg             | gcg          |
| 365      | M365K    | t1094a              | atg             | aag          |
| 391      | E391G    | a1172g              | gaa             | gga          |
| 394      | L394L    | c1180t              | ctg             | ttg          |
| 399      | R399L    | g1196t              | cgt             | ctt          |

**Supplementary Table S7:**

Nucleotide and amino acid exchanges in isolated *hisG* alleles.

| Mutein        | Mutation | Nucleotide exchange | Mutation | Nucleotide exchange |
|---------------|----------|---------------------|----------|---------------------|
| HisG-WT       |          |                     |          |                     |
| HisG-GT233-3  | G233H    | ggc742cat           | T235Q    | acg748cag           |
| HisG-GT233-8  | G233S    | ggc742agt           | T235R    | acg748agg           |
| HisG-GT233-4  | G233V    | ggc742gtg           | T235R    | acg748cgt           |
| HisG-GT233-5  | G233I    | ggc742att           | T235V    | acg748gtt           |
| HisG-GT233-1  | G233R    | ggc742cgg           | T235R    | acg748agg           |
| HisG-GT233-10 | G233L    | ggc742ctt           |          |                     |
| HisG-GT233-6  | G233H    | ggc742cat           | T235F    | acg748ttt           |
| HisG-GT233-11 | G233P    | ggc742cct           | T235L    | acg748ctg           |
| HisG-GT233-7  | G233R    | ggc742cgt           |          |                     |
| HisG-GT233-2  | G233S    | ggc742tcg           | T235H    | acg748agg           |
| HisG-N216-1   | N216I    | aac688att           |          |                     |
| HisG-N216-3   | N216R    | aac688cgt           |          |                     |
